# Supplementary material
Source: Springer Nature journal article supplement (https://www.springermedizin.de/resource/supplementary/12950_2013_296_MOESM2_ESM.pdf/9557496)

# A Neutrophil recruitment

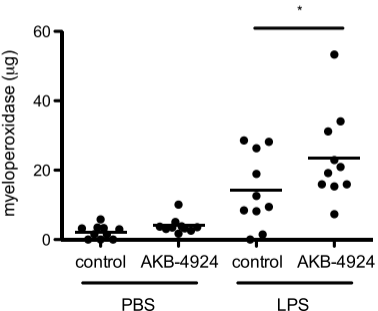

# B Skin histology

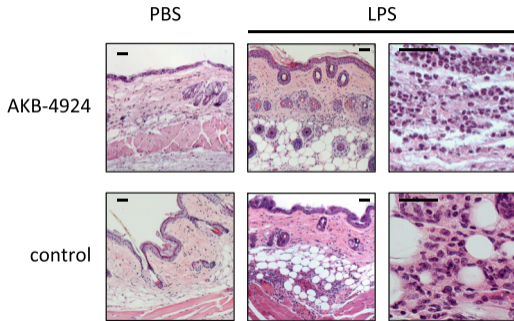

# C Histology score

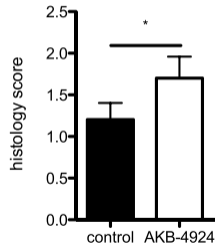

Supplement: MOESM2 [file 9557496]
